# Supplementary material for: Control of mRNA translation by dynamic ribosome modification
Source: PLoS Genet. 2020 Jun 25;16(6):e1008837. doi: 10.1371/journal.pgen.1008837 (PMC7343187; doi:10.1371/journal.pgen.1008837)
Supplement: S1 Table — (DOCX) [file pgen.1008837.s009.docx]

**S1 Table Kinetic models for RimK ATPase activity**

| **Model** | **Chemical reactions** | **Constraints** |
| --- | --- | --- |
| **Two state RimK** |  |  |
| **Three state RimK** |  |  |
| **Four state RimK** |  |  |
| **Five state RimK** |  |  |
